# Supplementary material for: Matrisome AnalyzeR – a suite of tools to annotate and quantify ECM molecules in big datasets across organisms
Source: PubMed Central journal article supplement (PMC10499032; doi:10.1242/jcs.261255), 2023-09-04
Supplement: joces-136-261255-s1.pdf [file joces-136-261255-s1.pdf]

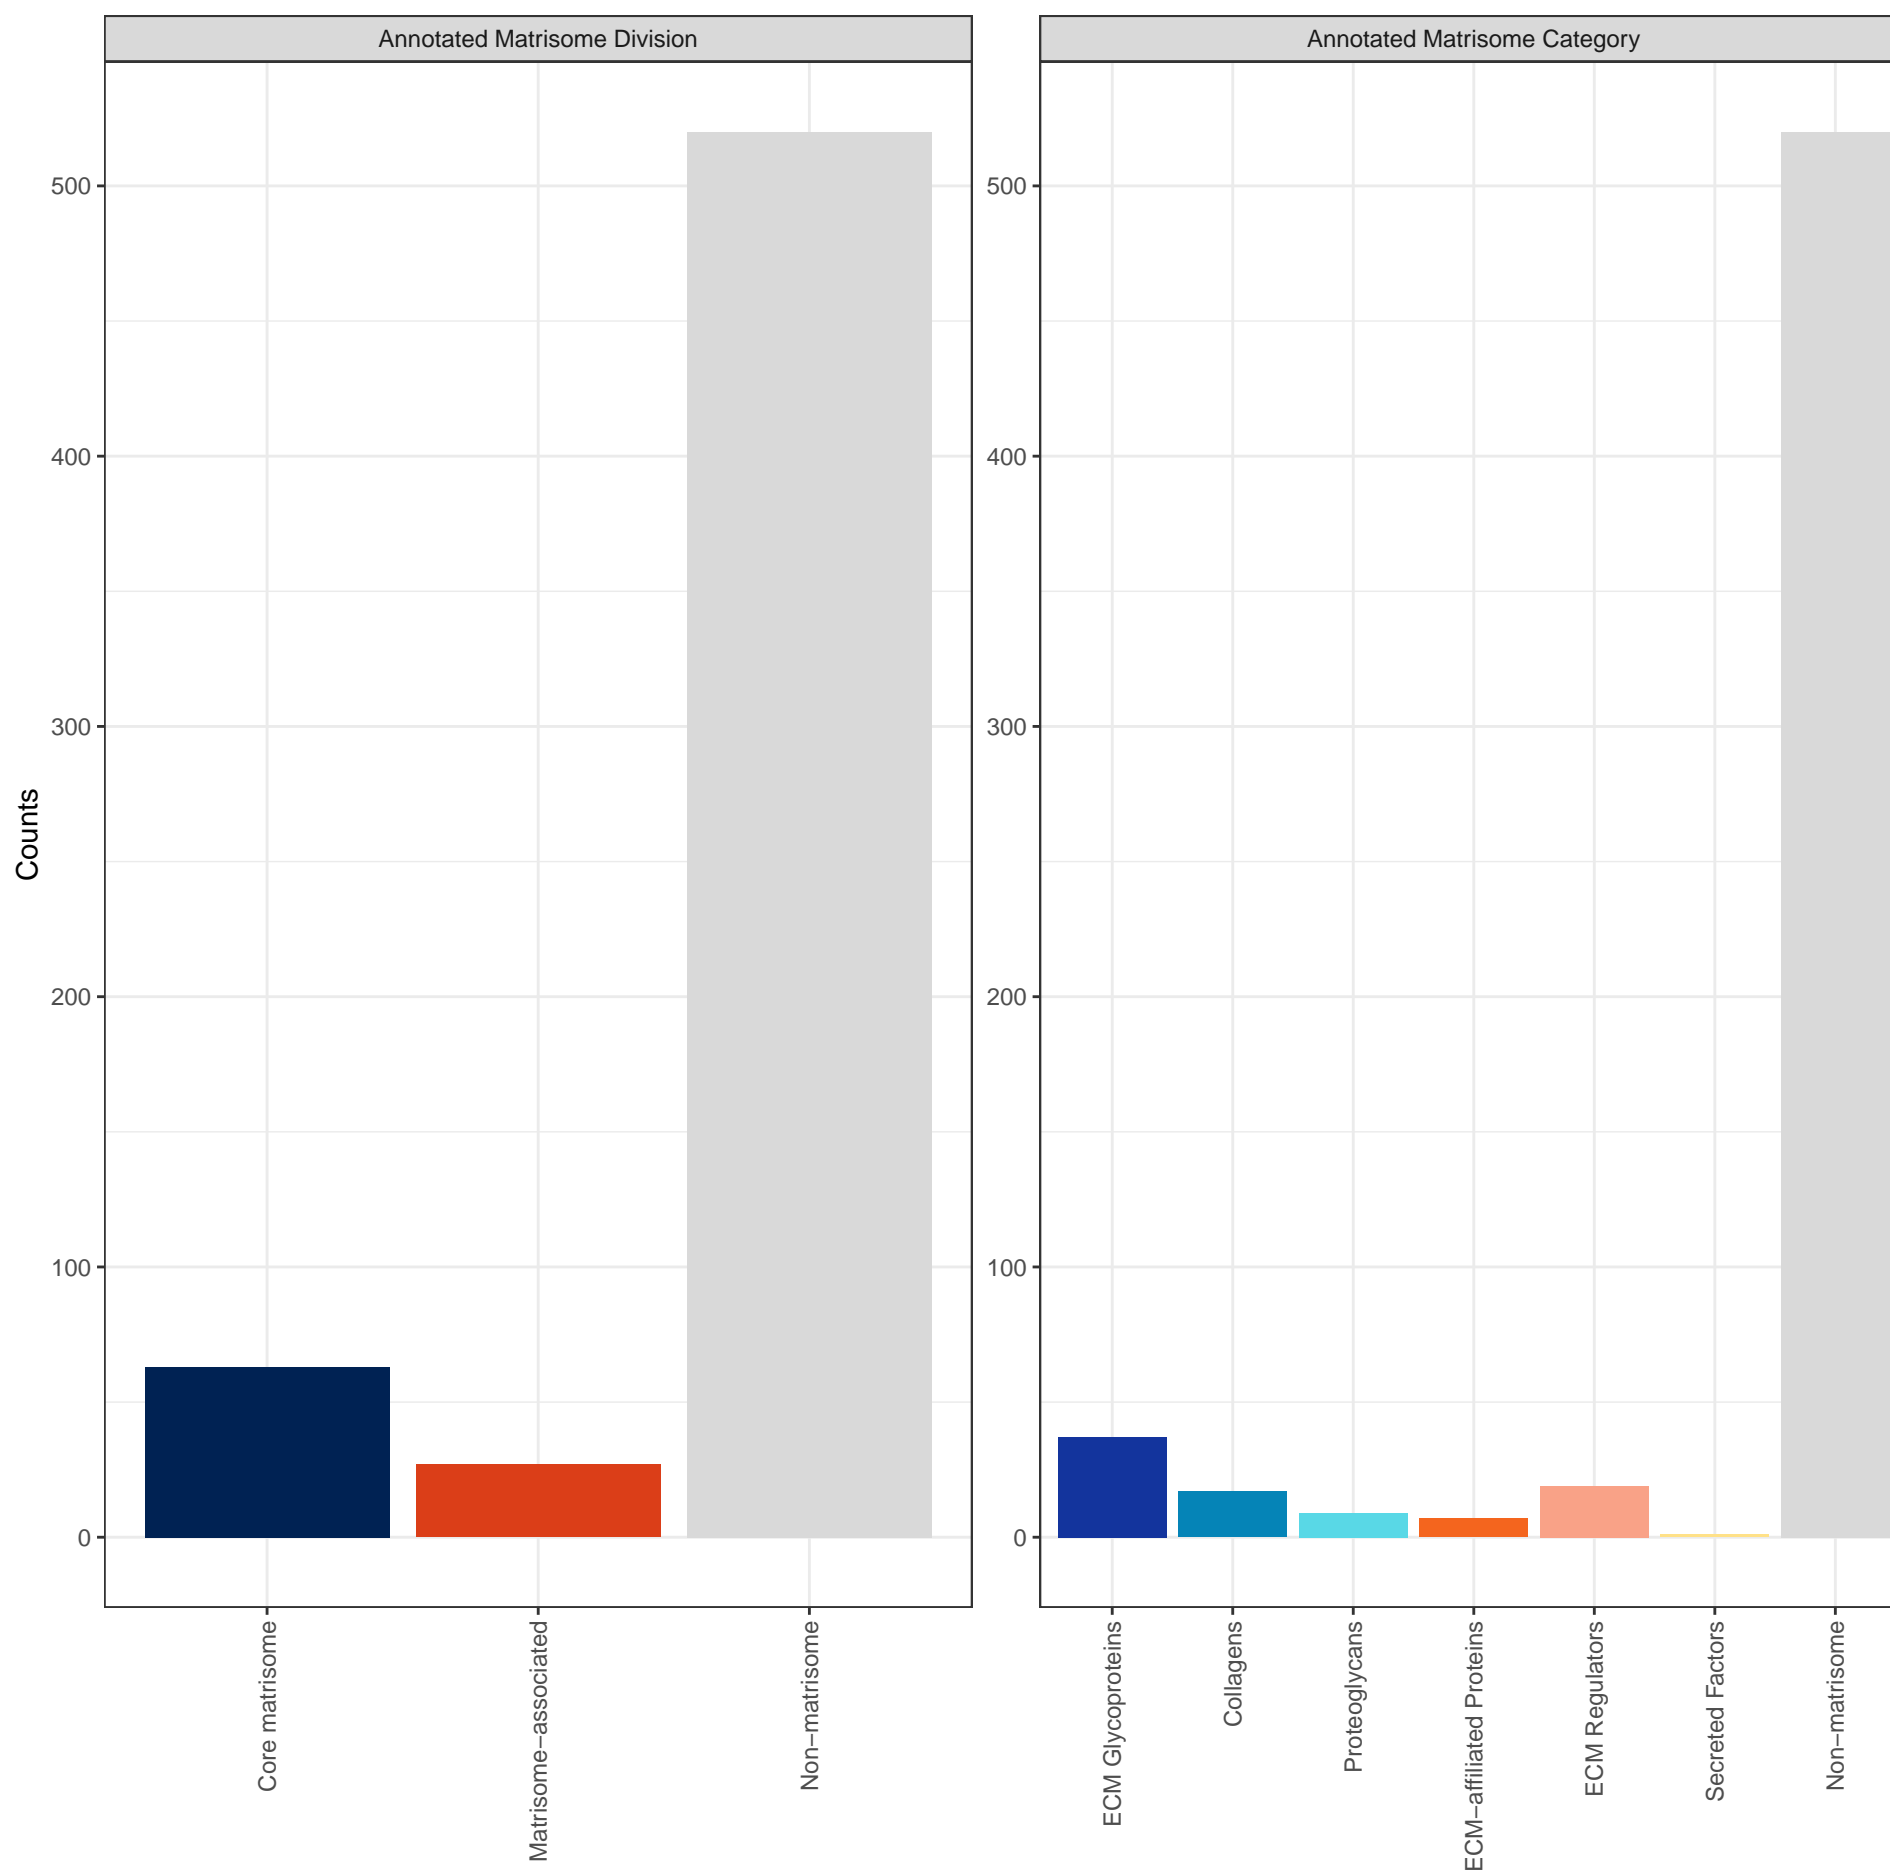

**Fig. S1.** Bar graphs resulting from inputting the test file provided as Supplementary File S1 and selecting the “Annotate” workflow of the web-based Matrisome AnalyzeR application.

**Table S1. Matrisome AnalyzeR\_Test file**

.csv file containing proteomic data from three technical replicates on ECM samples from human Fallopian tubes (Renner et al., 2022) used as an example to demonstrate the functionalities of the web-based Matrisome AnalyzeR application.

[Click here to download Table S1](#)

**Table S2.** .csv file resulting from inputting the test file provided as Table S1 and selecting the “Annotate” workflow of the web-based Matrisome AnalyzeR application.

[Click here to download Table S2](#)

**Table S3. Analysis:** .csv file resulting from inputting the test file provided as Table S1 and selecting the “Annotate & Analyze” workflow of the web-based Matrisome AnalyzeR application.

[Click here to download Table S3](#)
